# Supplementary material for: A paper-based dual functional biosensor for safe and user-friendly point-of-care urine analysis
Source: Royal Society of Chemistry journal article supplement (doi:10.1039/d4lc00163j), 2024-01-01

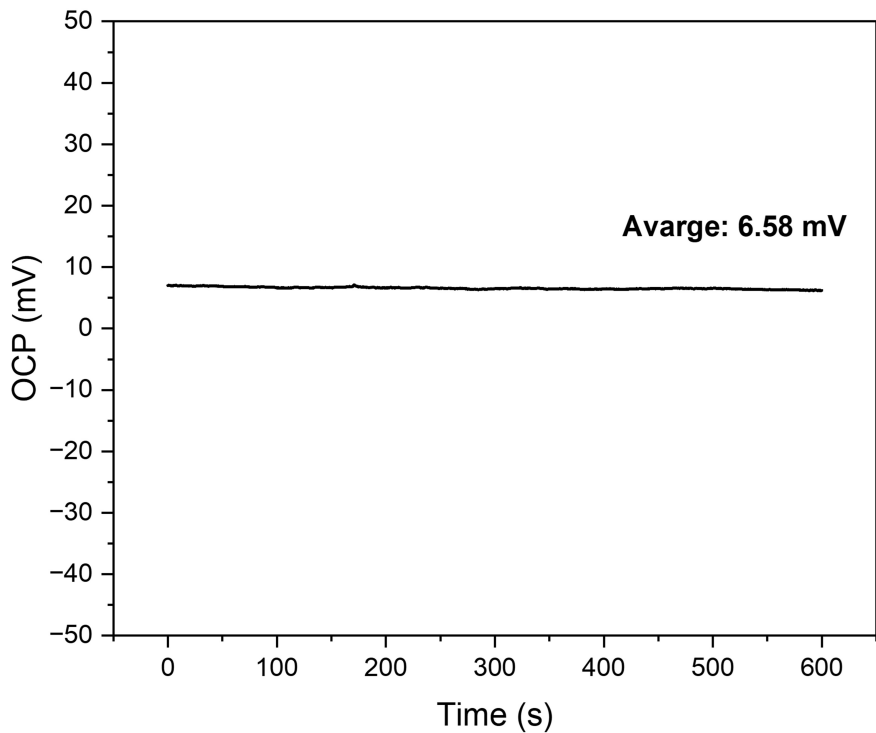

Supplement: d4lc00163j12.pdf [file d4lc00163j12.pdf]
